# Supplementary material for: Novel porous iron phthalocyanine based metal–organic framework electrochemical sensor for sensitive vanillin detection
Source: Royal Society of Chemistry journal article supplement (doi:10.1039/d0ra06783k), 2020-01-01
Supplement: d0ra06783k1.pdf [file d0ra06783k1.pdf]

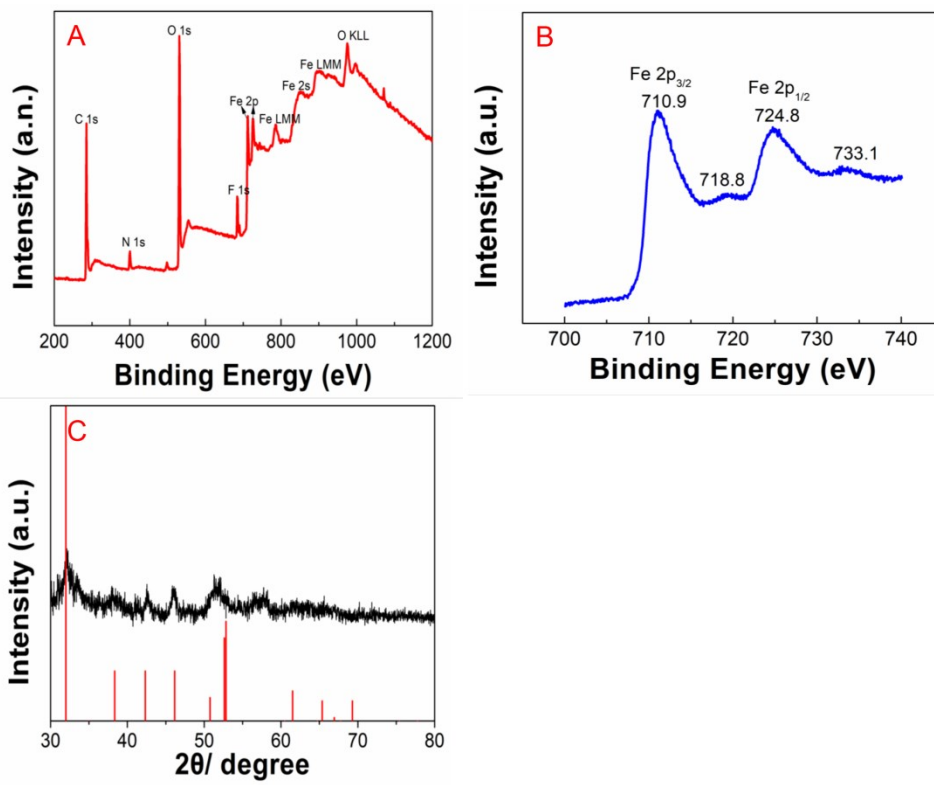

**Fig. S1** XPS data for FePc MOF: (A) survey scan; (B) Fe 2p spectrum. (C) XRD spectra of FePc MOF (black: experimental); (red: simulation).

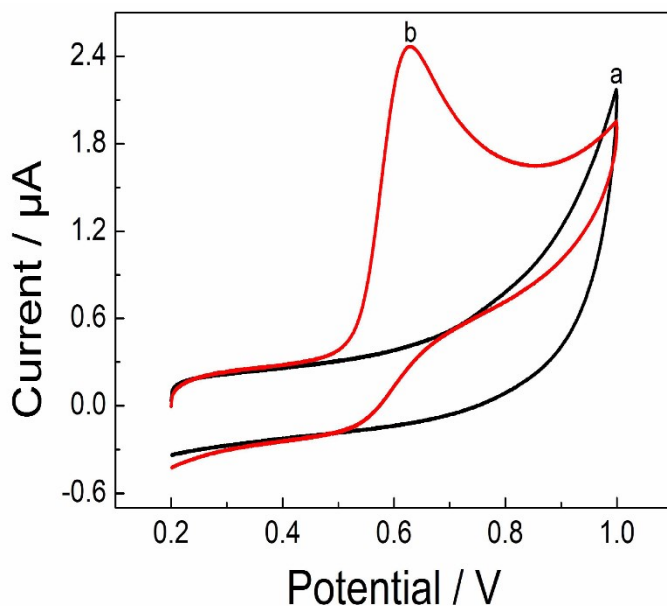

**Fig. S2.** CV of without (a) and with vanillin (b) on FePc MOF/GCE.

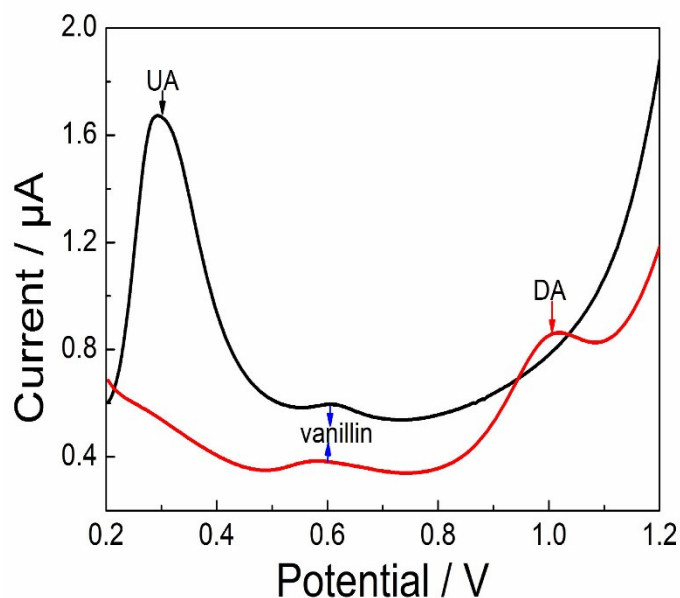

**Fig. S3.** DPV of 1.5  $\mu\text{M}$  vanillin at FePc MOF/GCE when coexisting with 150  $\mu\text{M}$  UA and DA.

**Table S1.** Analytical results for the determination of vanillin in human serum.

| Sample | Added ( $\mu\text{M}$ ) | Found ( $\mu\text{M}$ ) | Recovery(% , n=5) | RSD(%) |
|--------|-------------------------|-------------------------|-------------------|--------|
| Serum  | 15                      | 15.5                    | 102.9             | 3.16   |

**Table S2.** Analytical results for the determination of vanillin in tablets.

| Sample           | Labeled amount (mg) | Found (mg) | Percentage of labeled amount (% , n = 5) | RSD (%) |
|------------------|---------------------|------------|------------------------------------------|---------|
| Vanillin tablets | 200                 | UV: 207    | 103.6                                    | 1.18    |
|                  |                     | EC: 204    | 102.3                                    | 3.92    |
